# Supplementary material for: Functional analysis of the type III secretion apparatus, bsaQ operon from Burkholderia pseudomallei
Source: Royal Society of Chemistry journal article supplement (doi:10.1039/c8dt02141d), 2007-03-01
Supplement: c8dt02141d1.pdf [file c8dt02141d1.pdf]

ESI for:

**New Synthetic Strategies Leading to [RPNR]<sup>-</sup> Anions and Isolation of the [P(Nt-Bu)<sub>3</sub>]<sup>3-</sup> Trianion.**

*Jan Vrána, Roman Jambor, Aleš Růžička and Libor Dostál\**

\*E-mail: libor.dostal@upce.cz

**Table of contents:**

|                                     |                     |
|-------------------------------------|---------------------|
| 1) NMR spectra of studied compounds | <b>pages S2-S17</b> |
| 2) References                       | <b>page S18</b>     |

**NMR spectra of studied compounds.**

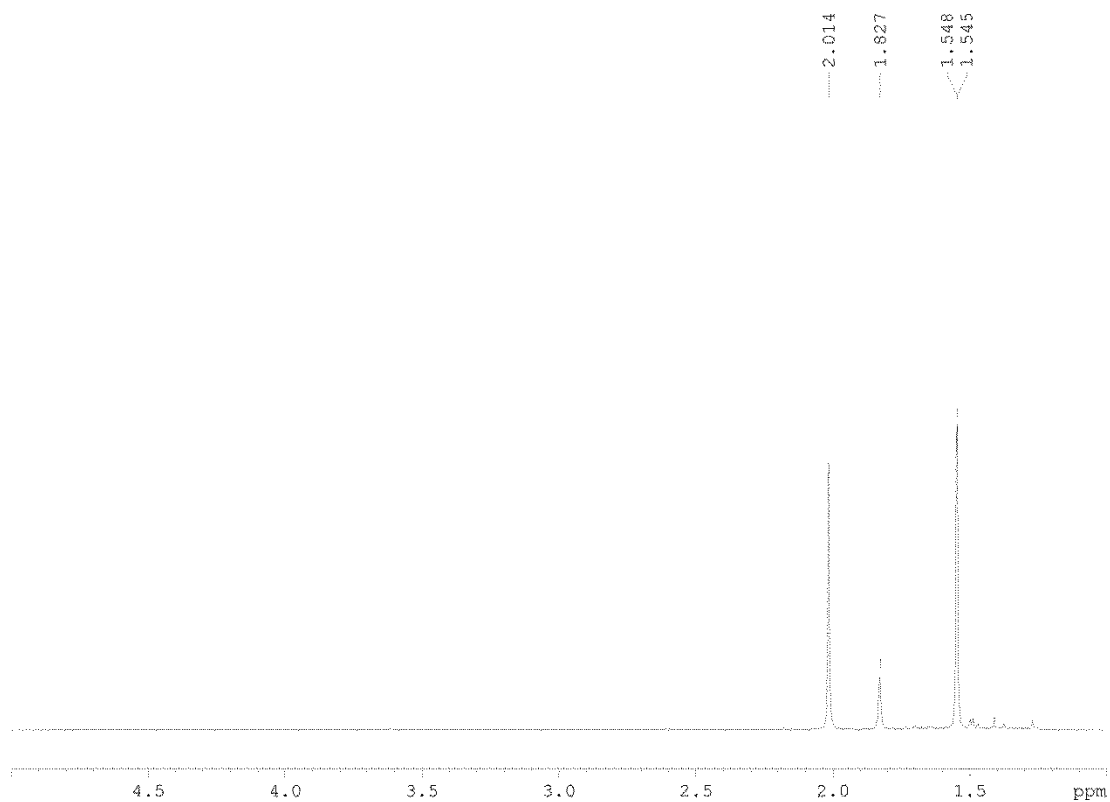

Figure S1:  $^1\text{H}$  NMR spectrum of compound **1** acquired in  $\text{C}_6\text{D}_6$ .

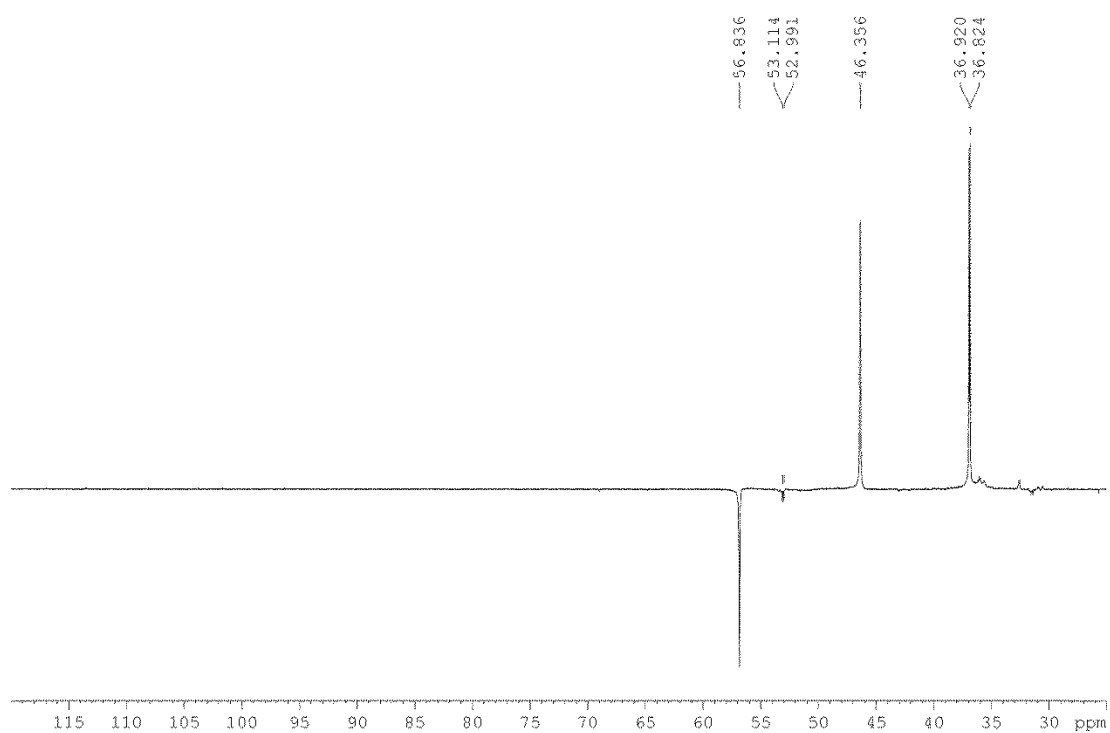

Figure S2:  $^{13}\text{C}\{^1\text{H}\}$  NMR spectrum of compound **1** acquired in  $\text{C}_6\text{D}_6$ .

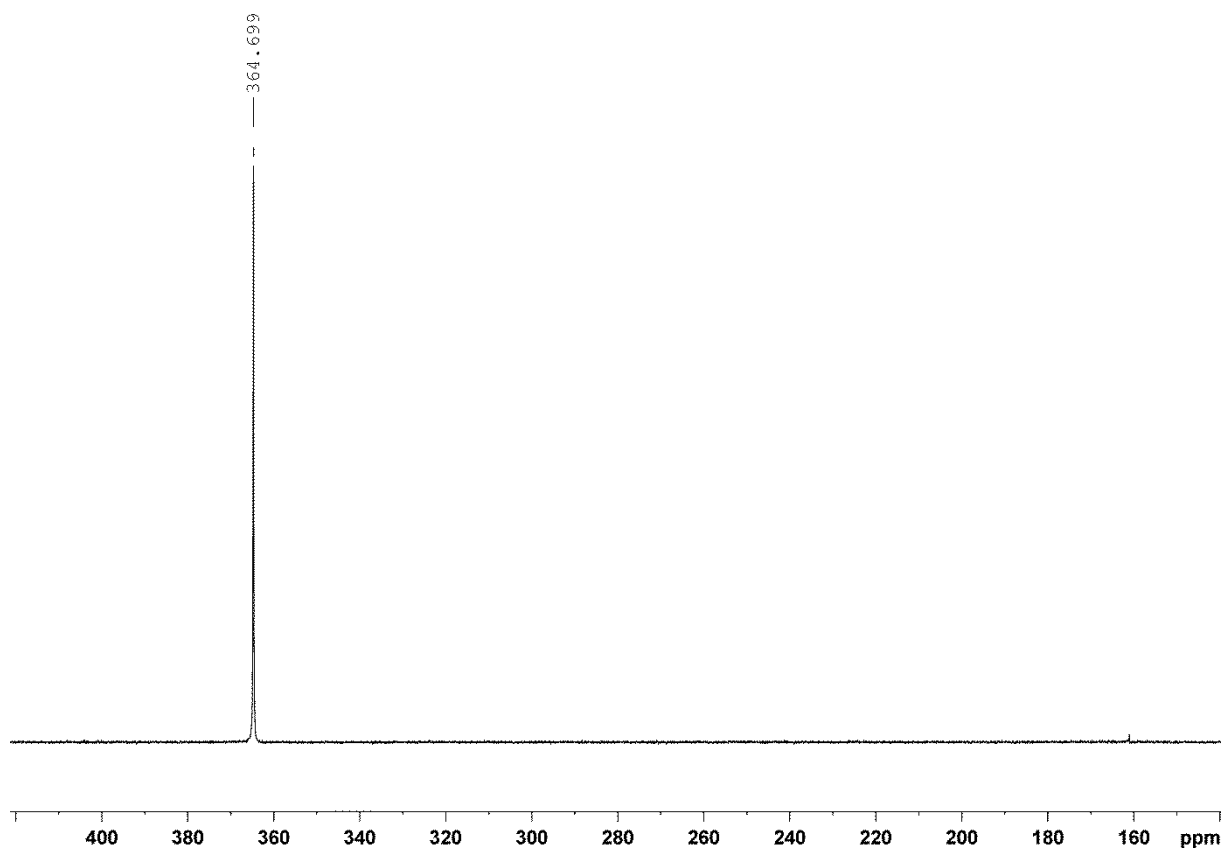

Figure S3:  $^{31}\text{P}\{^1\text{H}\}$  NMR spectrum of compound **1** acquired in  $\text{C}_6\text{D}_6$ .

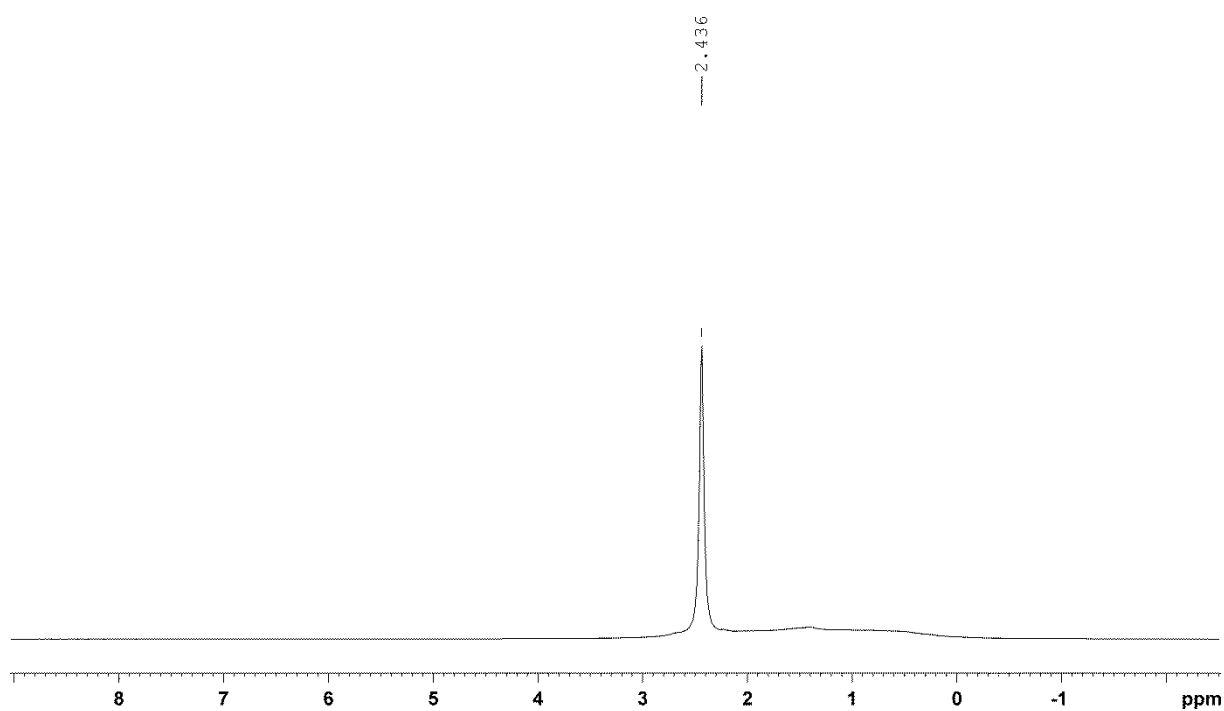

Figure S4:  ${}^7\text{Li}\{{}^1\text{H}\}$  NMR spectrum of compound **1** acquired in  $\text{C}_6\text{D}_6$ .

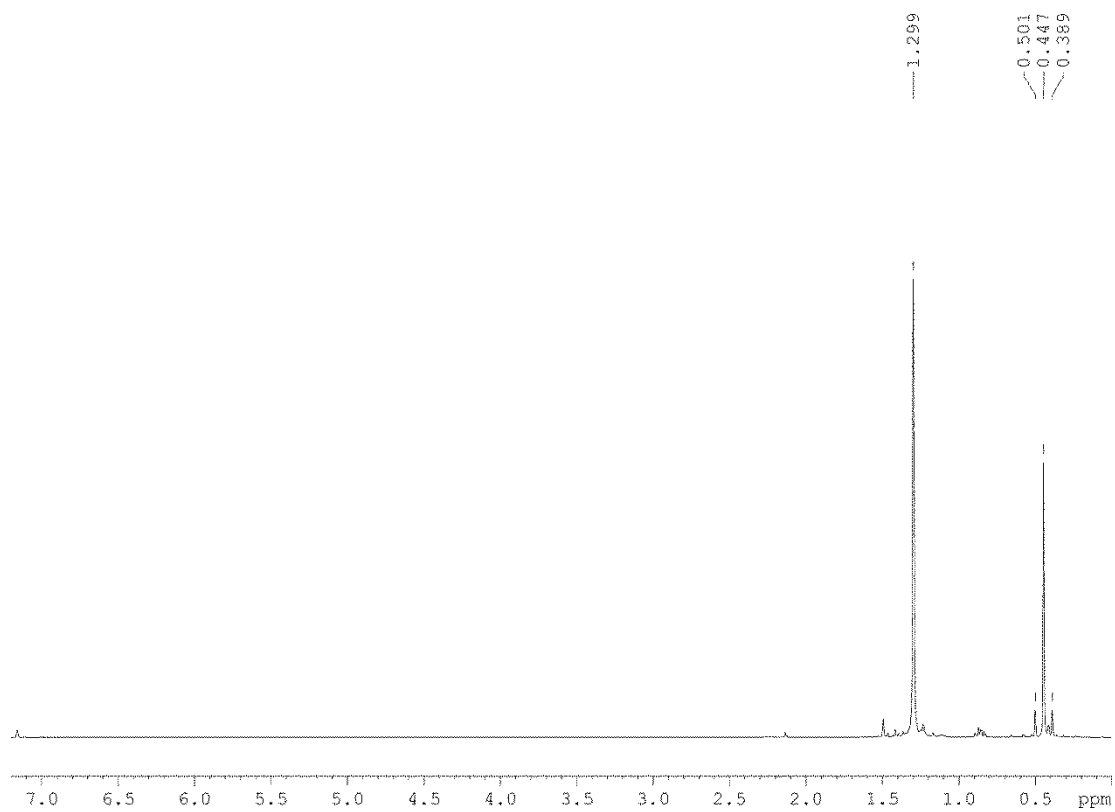

Figure S5:  ${}^1\text{H}$  NMR spectrum of compound **3** acquired in  $\text{C}_6\text{D}_6$ .

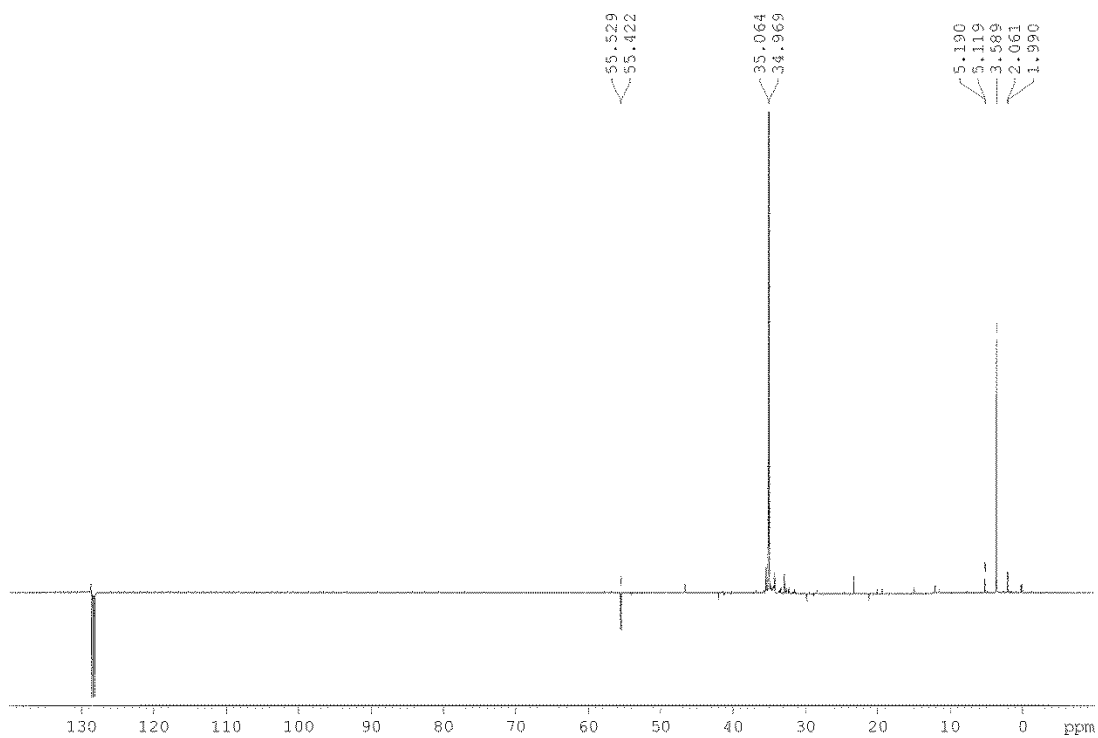

Figure S6:  $^{13}\text{C}\{^1\text{H}\}$  NMR spectrum of compound **3** acquired in  $\text{C}_6\text{D}_6$ .

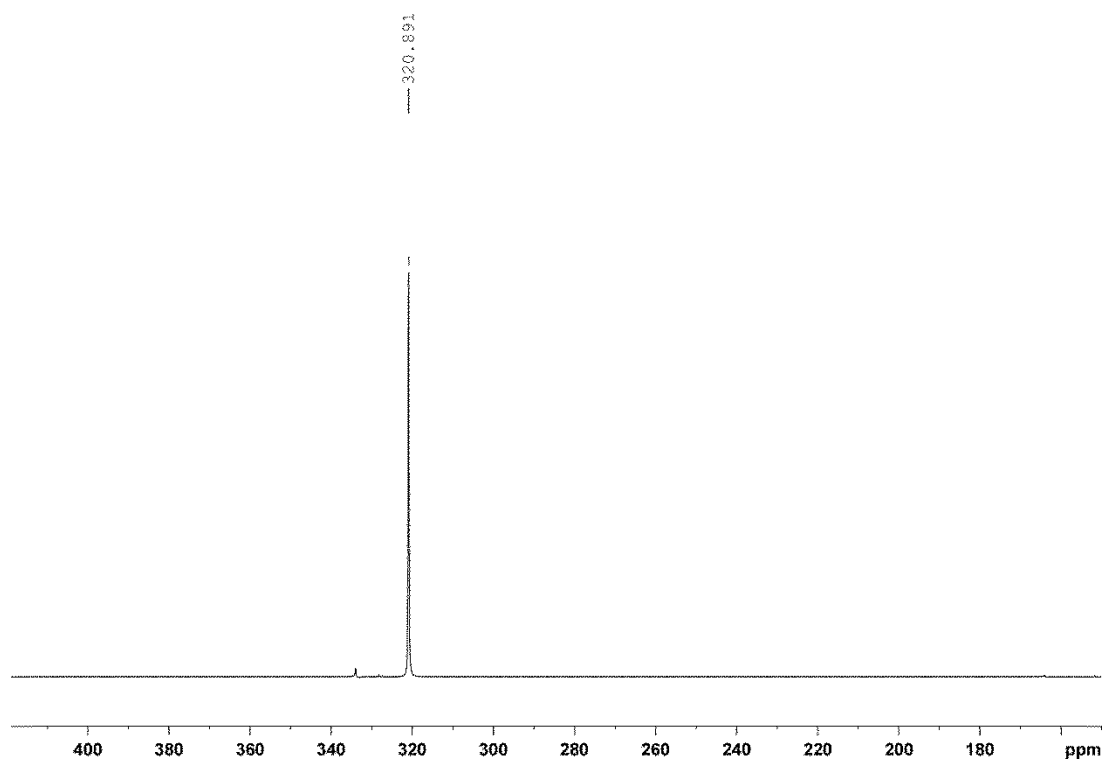

Figure S7:  $^{31}\text{P}\{^1\text{H}\}$  NMR spectrum of compound **3** acquired in  $\text{C}_6\text{D}_6$ .

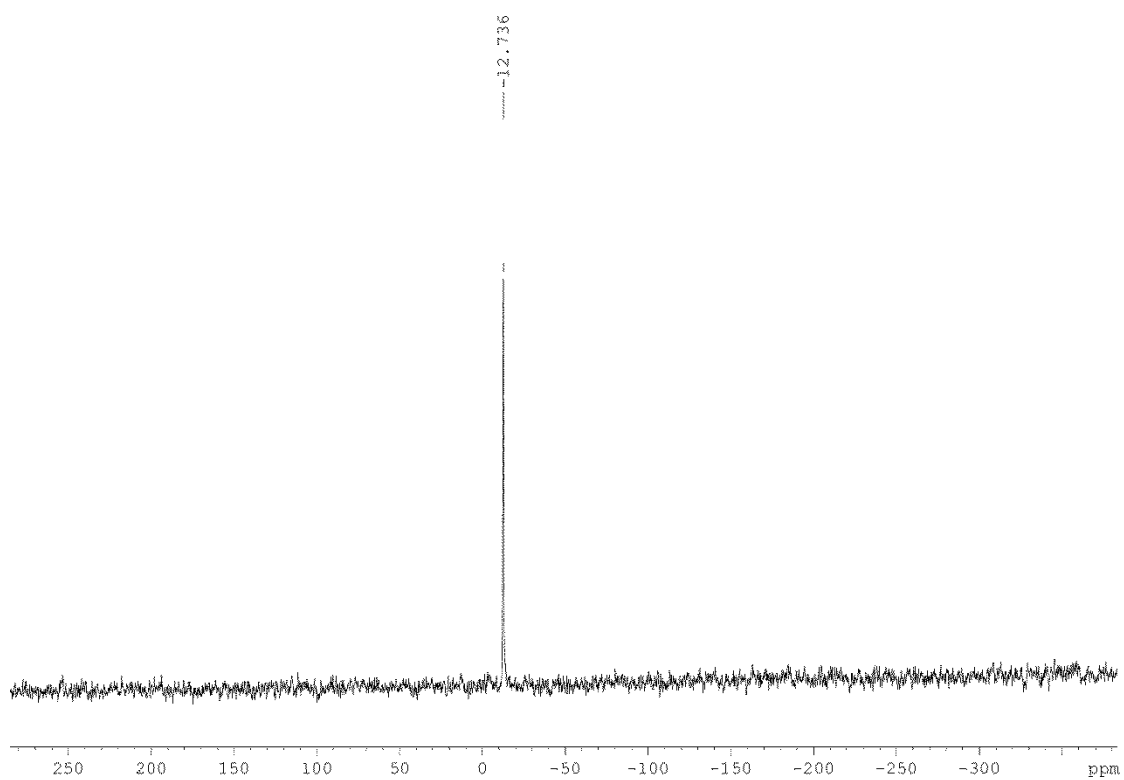

Figure S8:  $^{119}\text{Sn}\{^1\text{H}\}$  NMR spectrum of compound **3** acquired in  $\text{C}_6\text{D}_6$ .

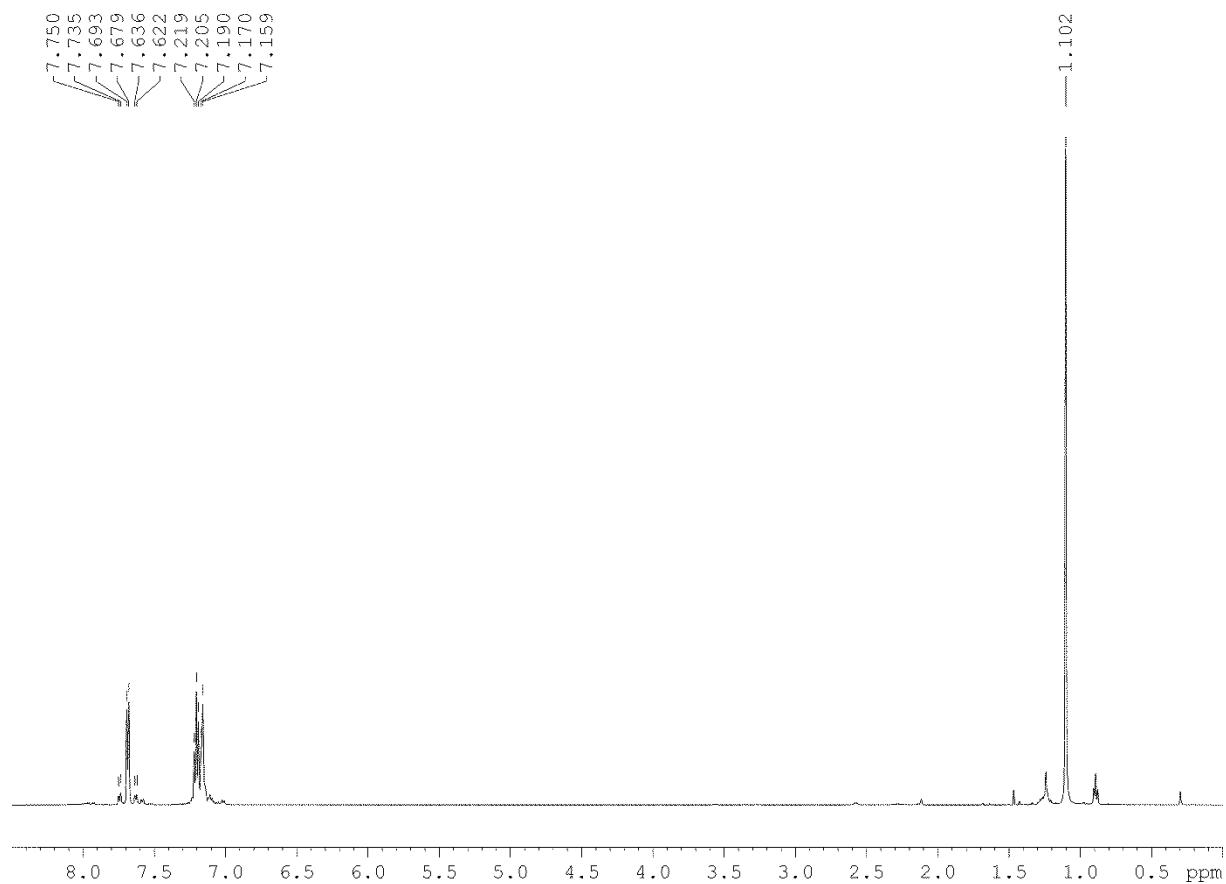

Figure S9:  $^1\text{H}$  NMR spectrum of compound **4** acquired in  $\text{C}_6\text{D}_6$ .

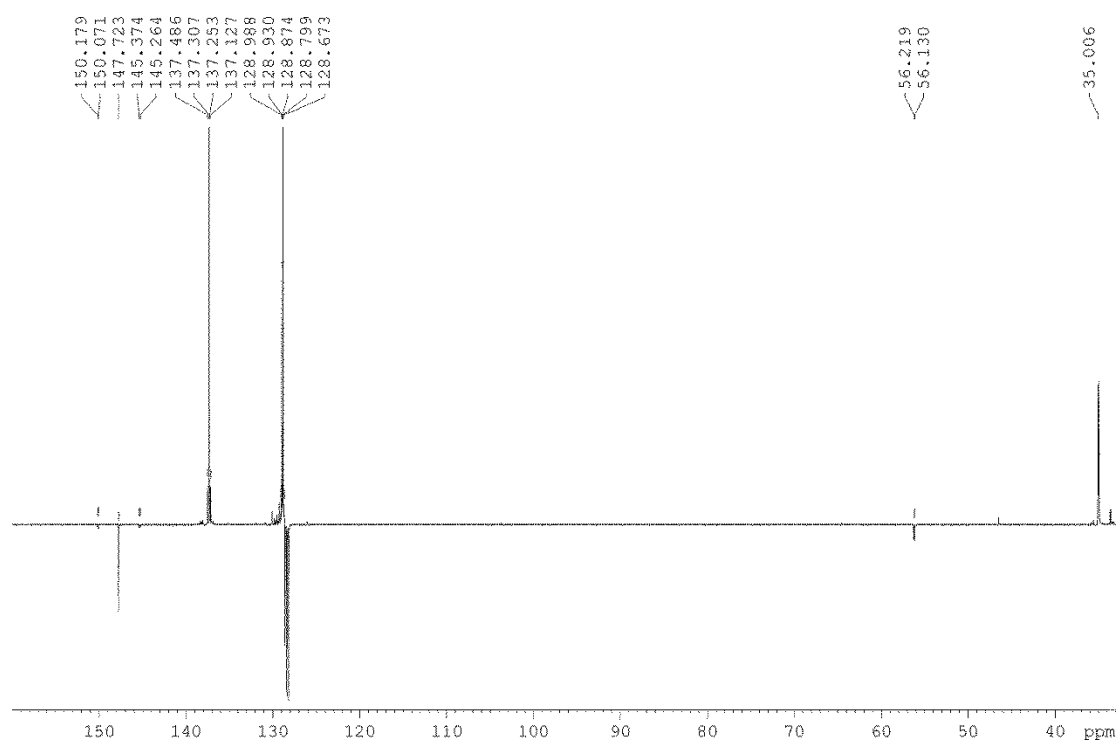

Figure S10:  $^{13}\text{C}\{^1\text{H}\}$  NMR spectrum of compound **4** acquired in  $\text{C}_6\text{D}_6$ .

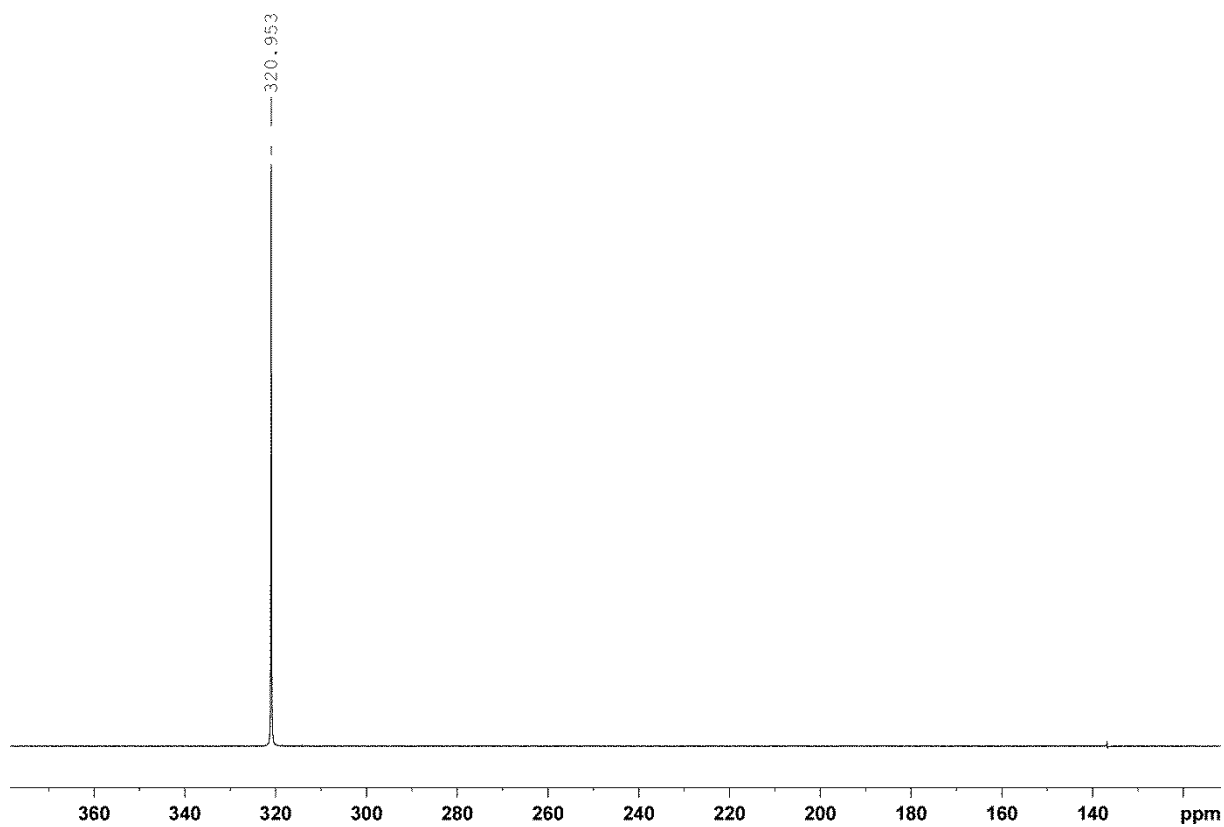

Figure S11:  $^{31}\text{P}\{^1\text{H}\}$  NMR spectrum of compound **4** acquired in  $\text{C}_6\text{D}_6$ .

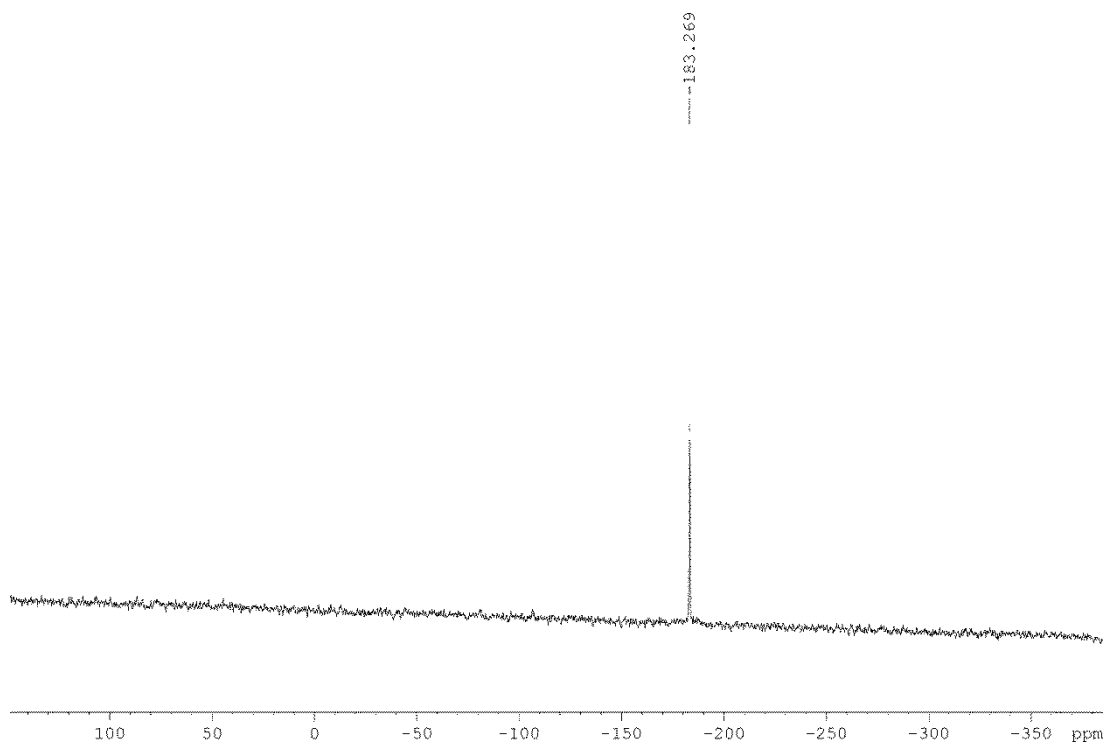

Figure S12:  $^{119}\text{Sn}\{^1\text{H}\}$  NMR spectrum of compound **4** acquired in  $\text{C}_6\text{D}_6$ .

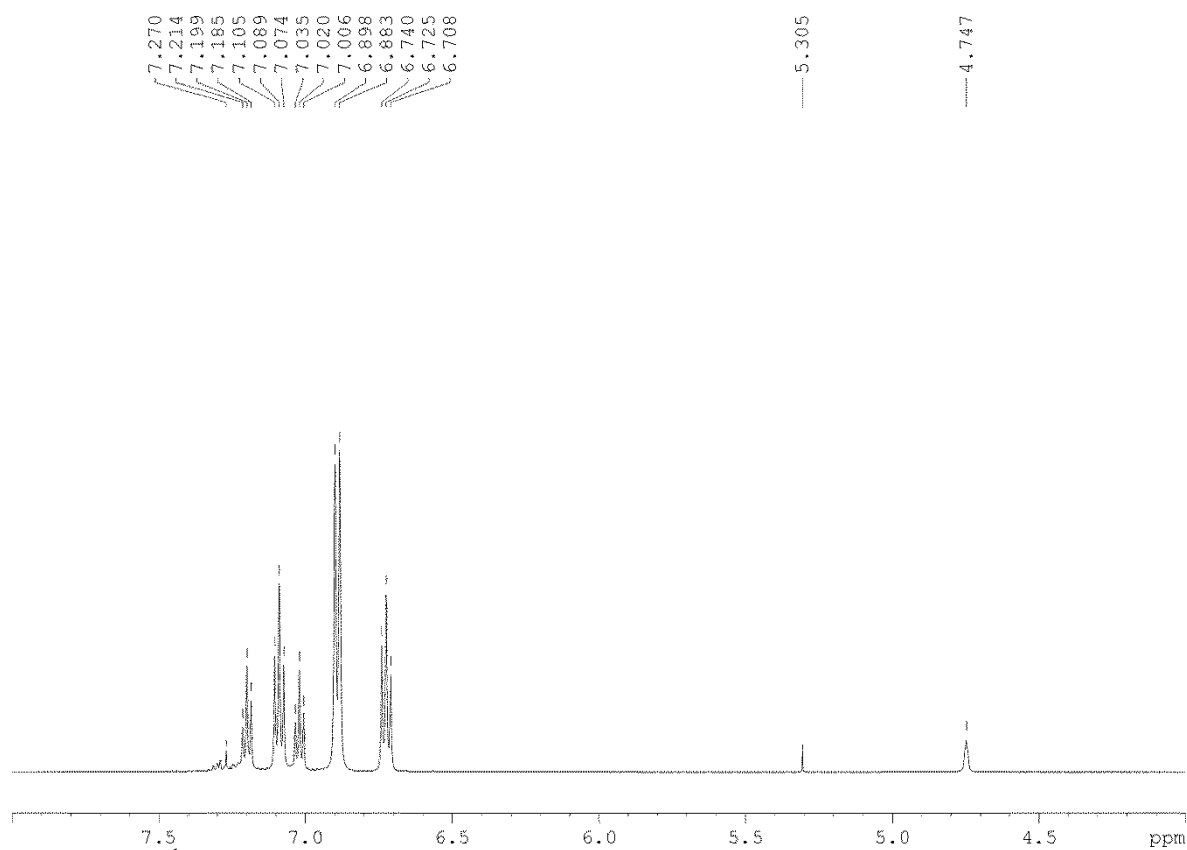

Figure S13:  $^1\text{H}$  NMR spectrum of compound **5** acquired in  $\text{C}_6\text{D}_6$ .

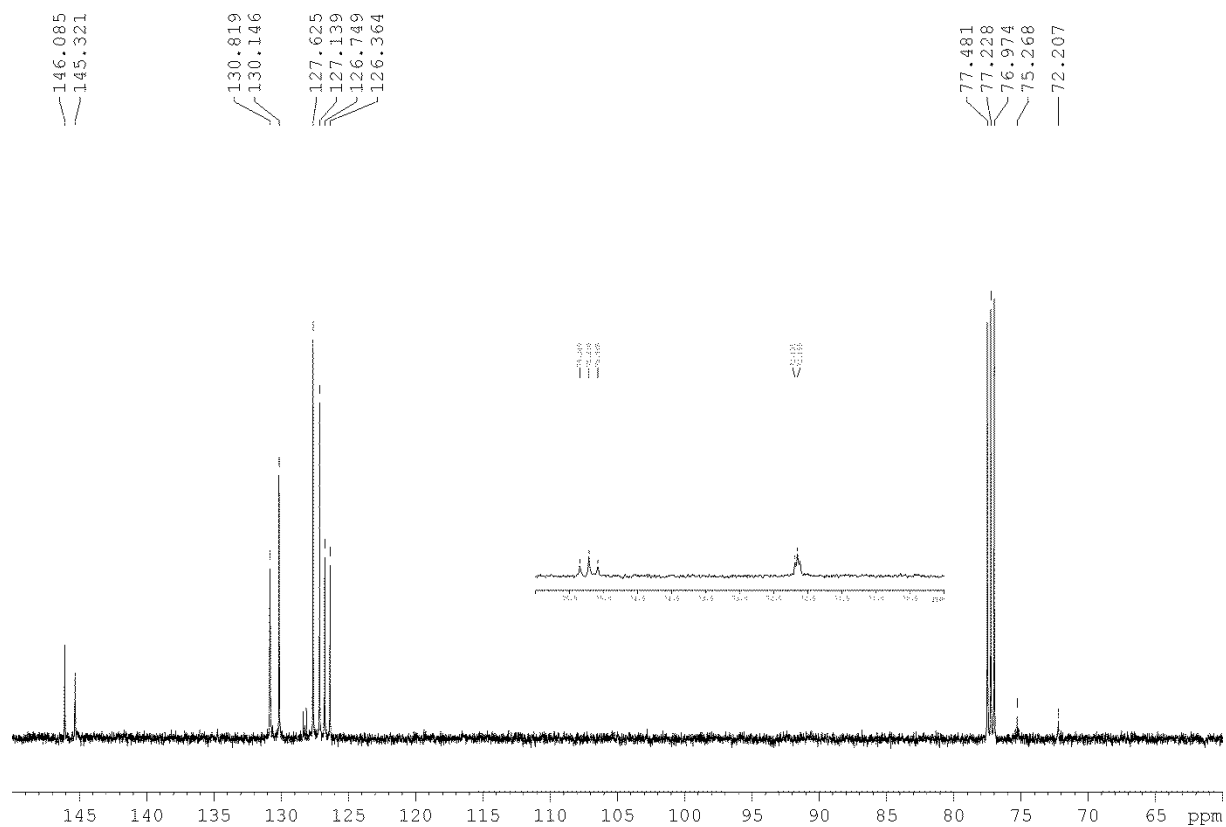



Figure S14:  $^{13}\text{C}\{^1\text{H}\}$  NMR spectrum of compound **5** acquired in  $\text{C}_6\text{D}_6$ .

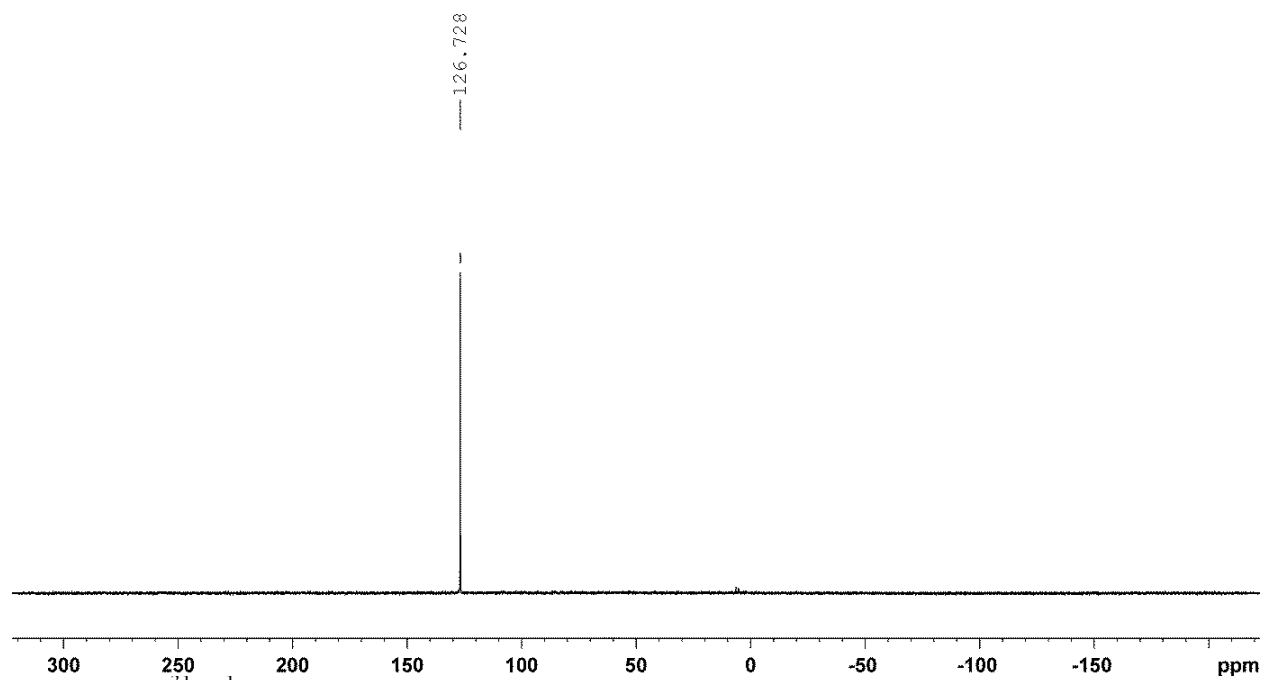

Figure S15:  $^3\text{P}\{^1\text{H}\}$  NMR spectrum of compound **5** acquired in  $\text{C}_6\text{D}_6$ .

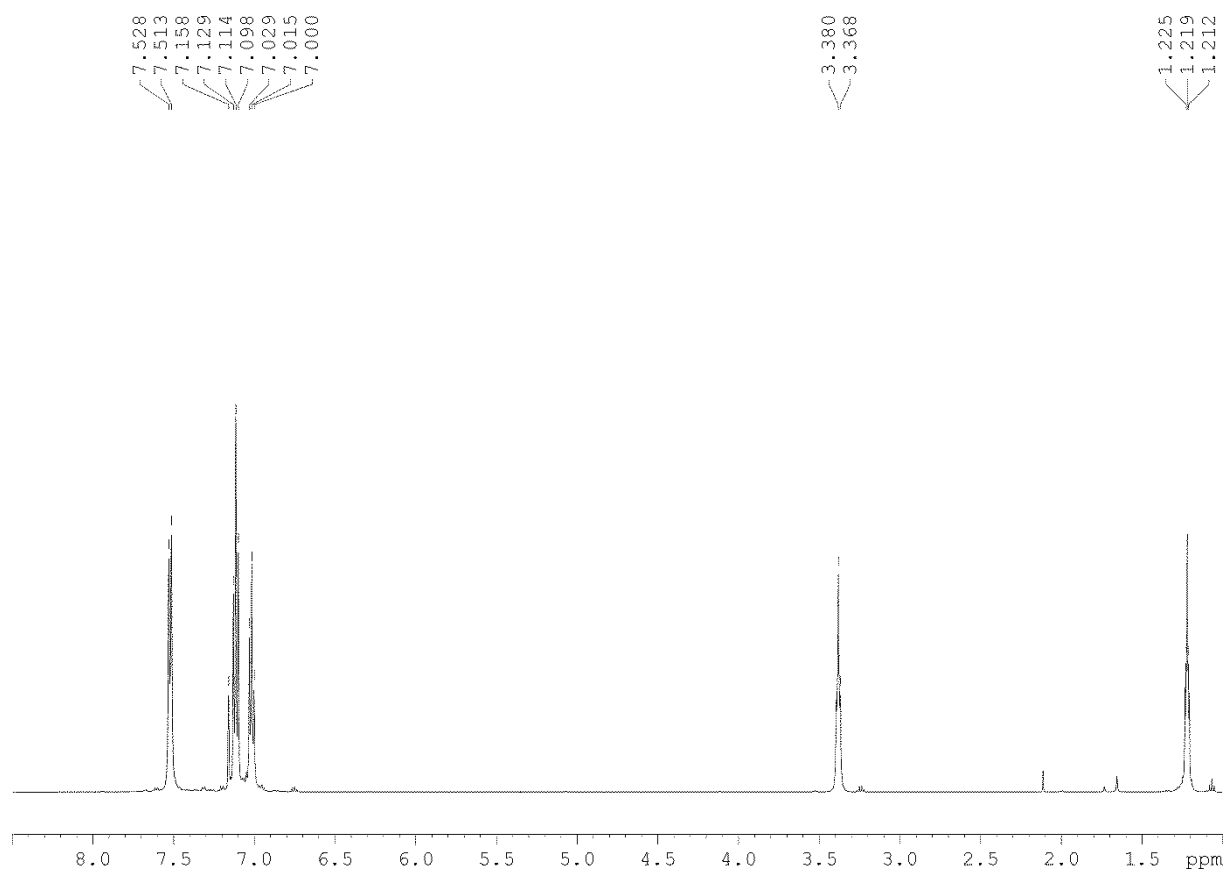

Figure S16:  $^1\text{H}$  NMR spectrum of compound **6** acquired in  $\text{C}_6\text{D}_6$ .

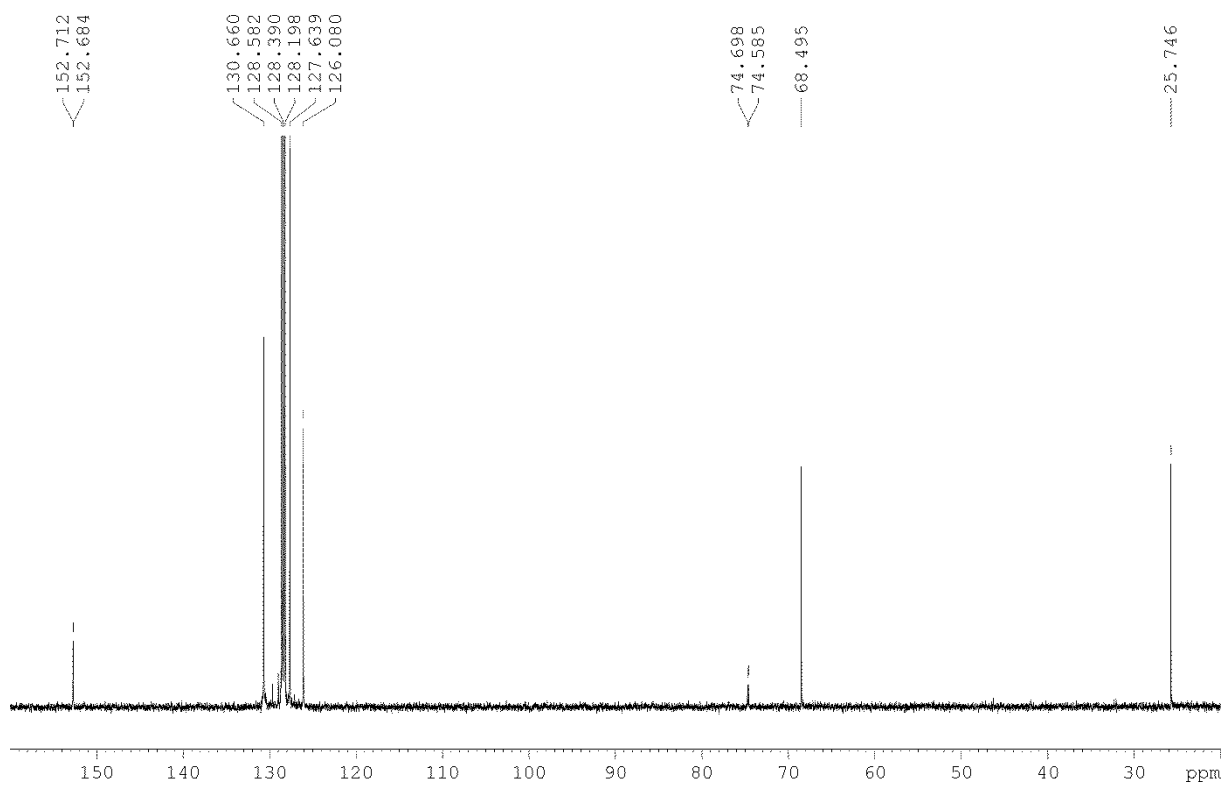

Figure S17:  $^{13}\text{C}\{^1\text{H}\}$  NMR spectrum of compound **6** acquired in  $\text{C}_6\text{D}_6$ .

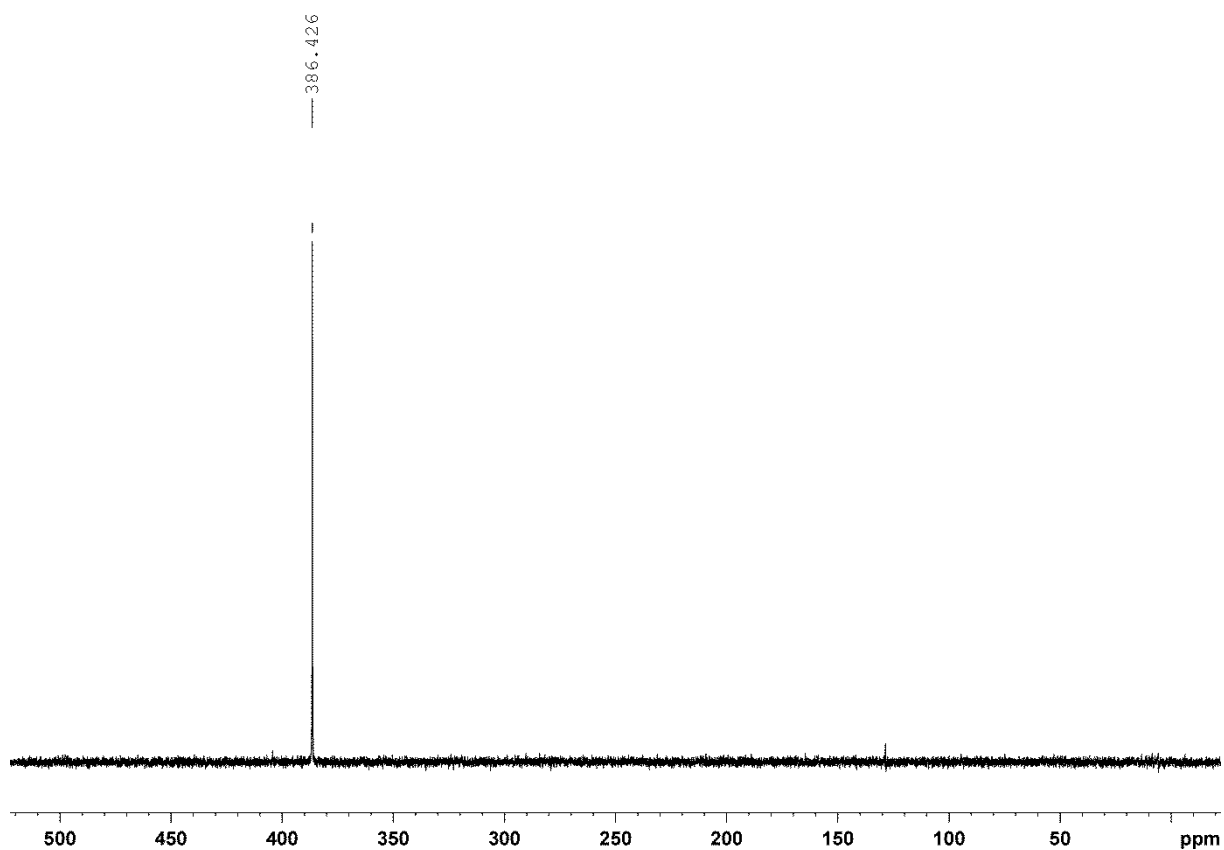

Figure S18:  $^{31}\text{P}\{^1\text{H}\}$  NMR spectrum of compound **6** acquired in  $\text{C}_6\text{D}_6$ .

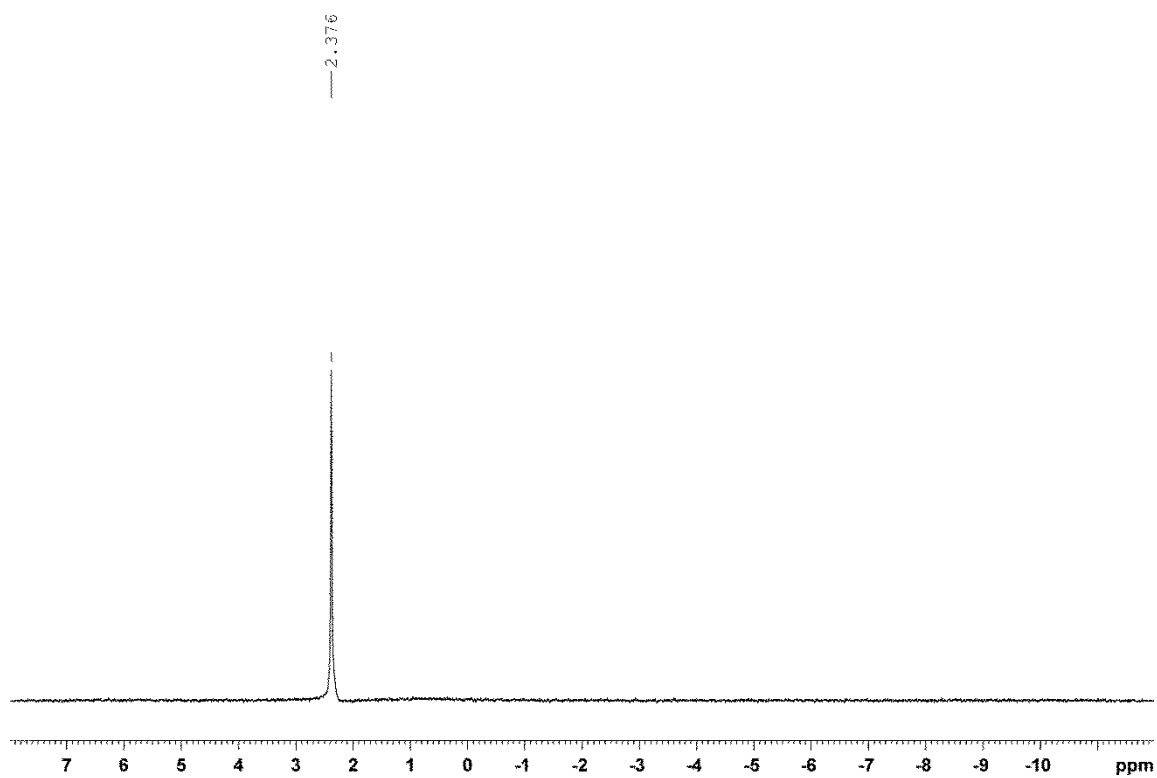

Figure S19:  ${}^7\text{Li}\{{}^1\text{H}\}$  NMR spectrum of compound **6** acquired in  $\text{C}_6\text{D}_6$ .

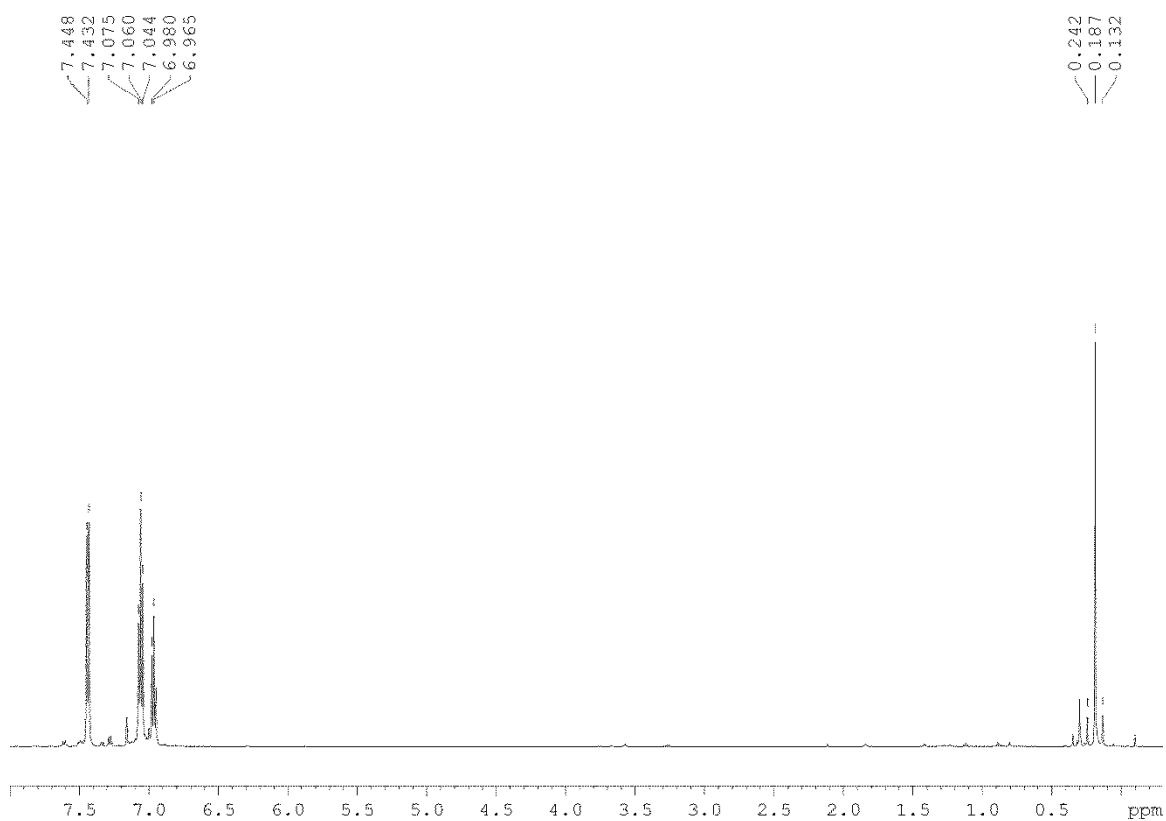

Figure S20:  ${}^1\text{H}$  NMR spectrum of compound **7** acquired in  $\text{C}_6\text{D}_6$ .

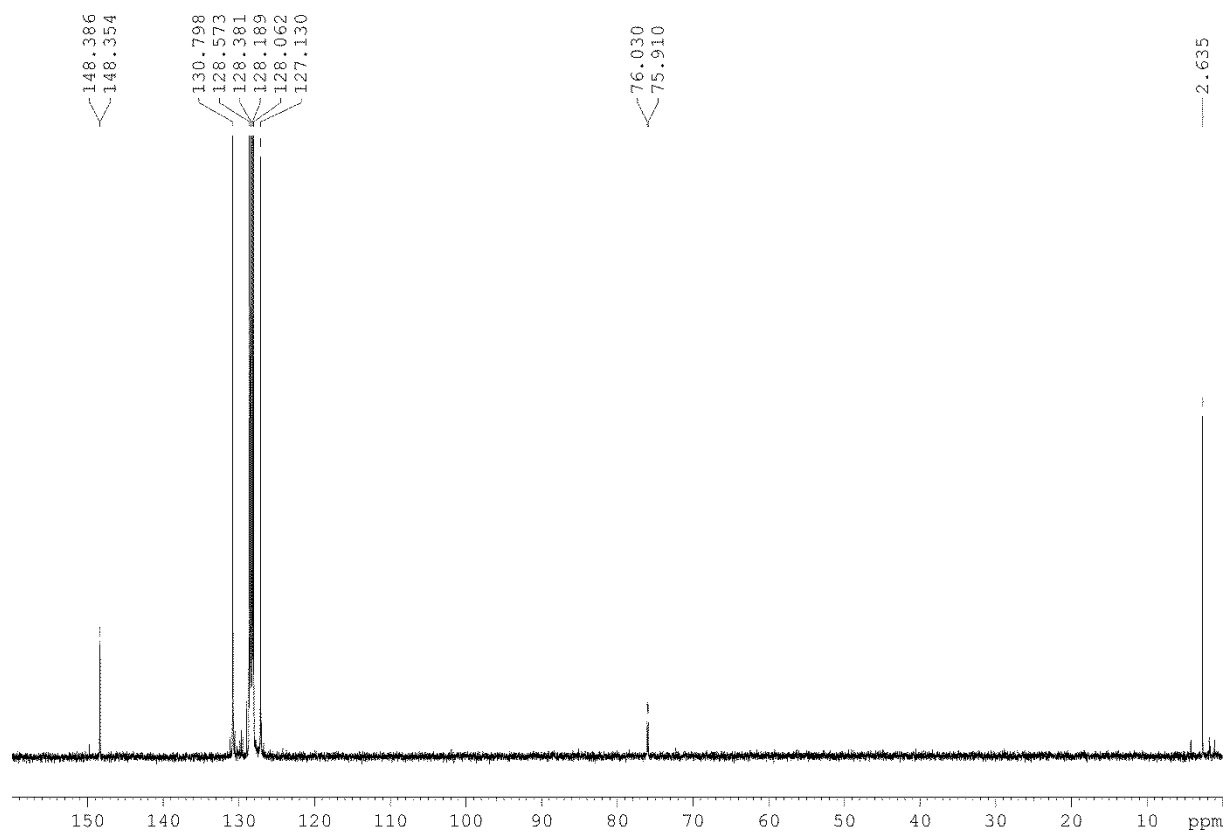

Figure S21:  $^{13}\text{C}\{^1\text{H}\}$  NMR spectrum of compound **7** acquired in  $\text{C}_6\text{D}_6$ .

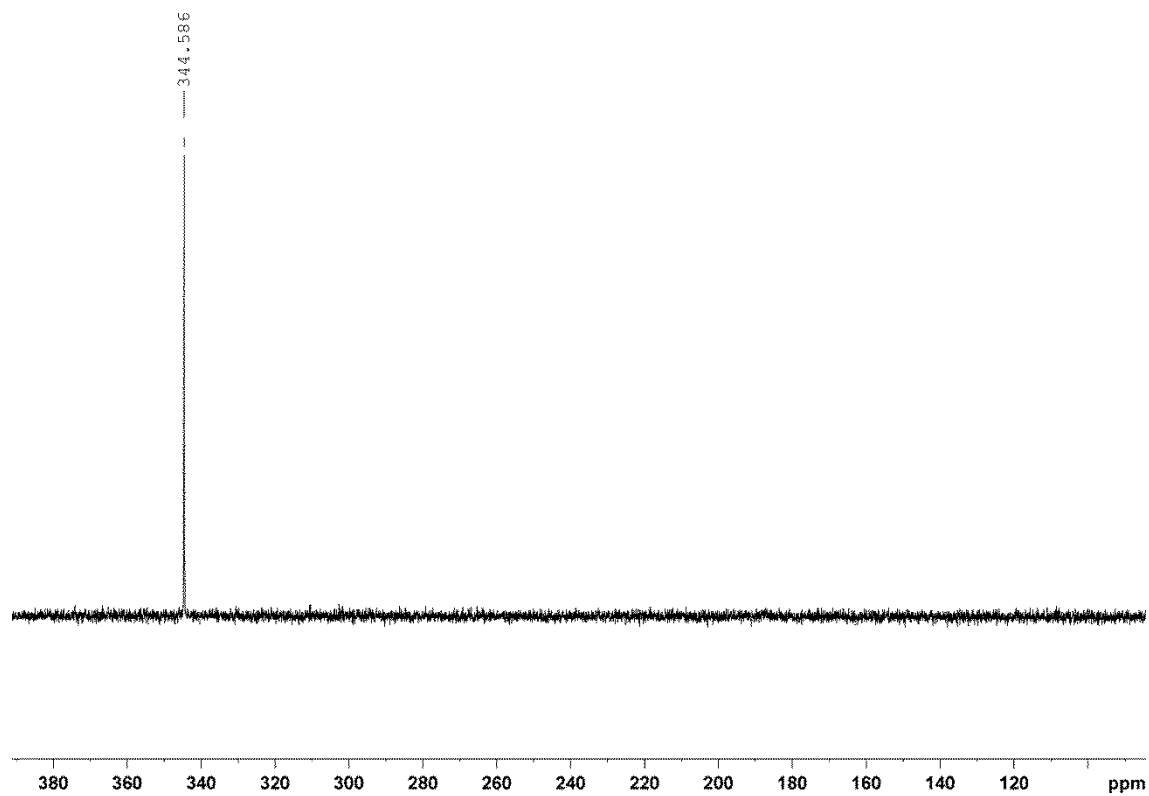

Figure S22:  $^{31}\text{P}\{^1\text{H}\}$  NMR spectrum of compound **7** acquired in  $\text{C}_6\text{D}_6$ .

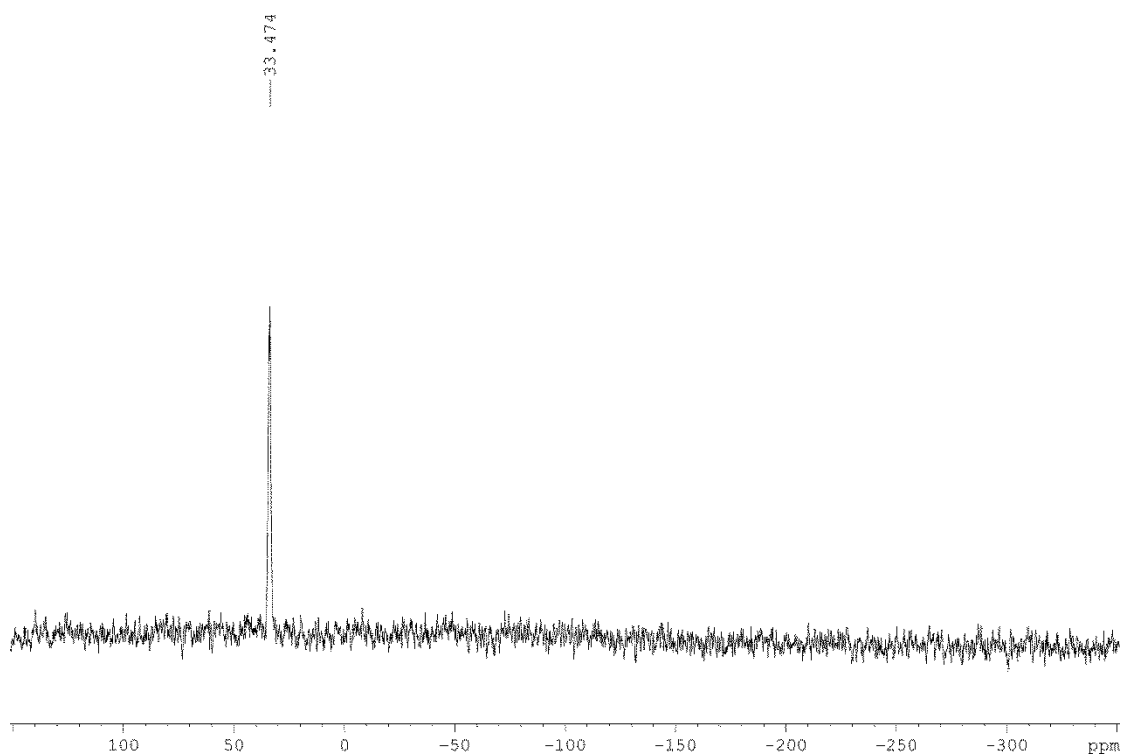

Figure S23:  $^{119}\text{Sn}\{^1\text{H}\}$  NMR spectrum of compound **7** acquired in  $\text{C}_6\text{D}_6$ .

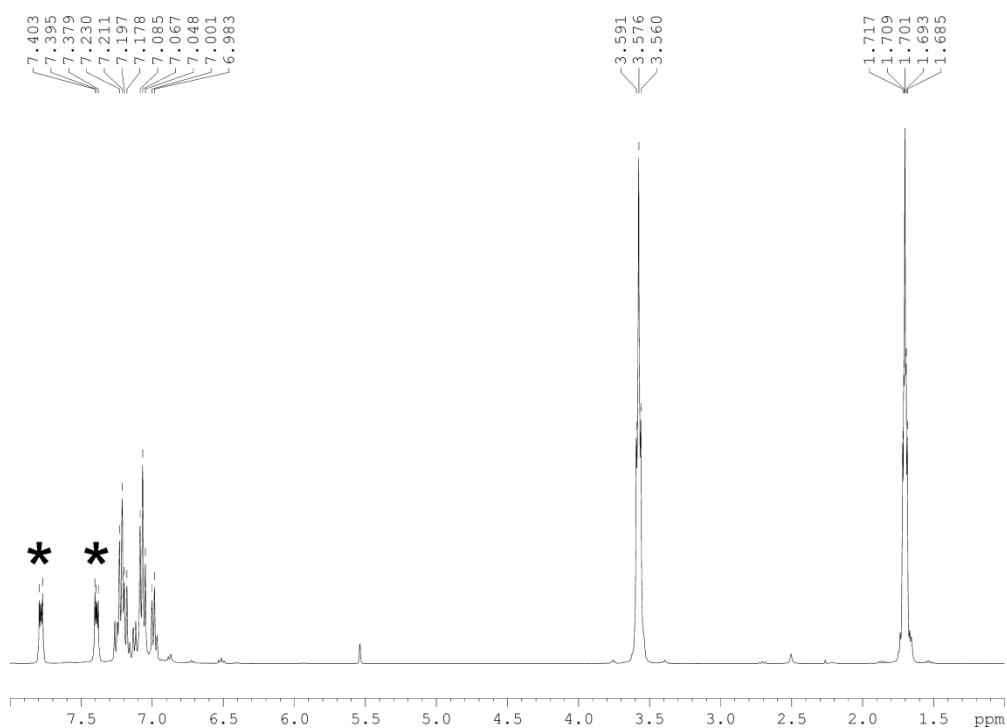

Figure S24:  $^1\text{H}$  NMR spectrum showing the crude reaction mixture of **5** with 2eqs. of sodium naphthalenide acquired in thf-D8. Signals of the naphthalene as a byproduct are marked with \*.

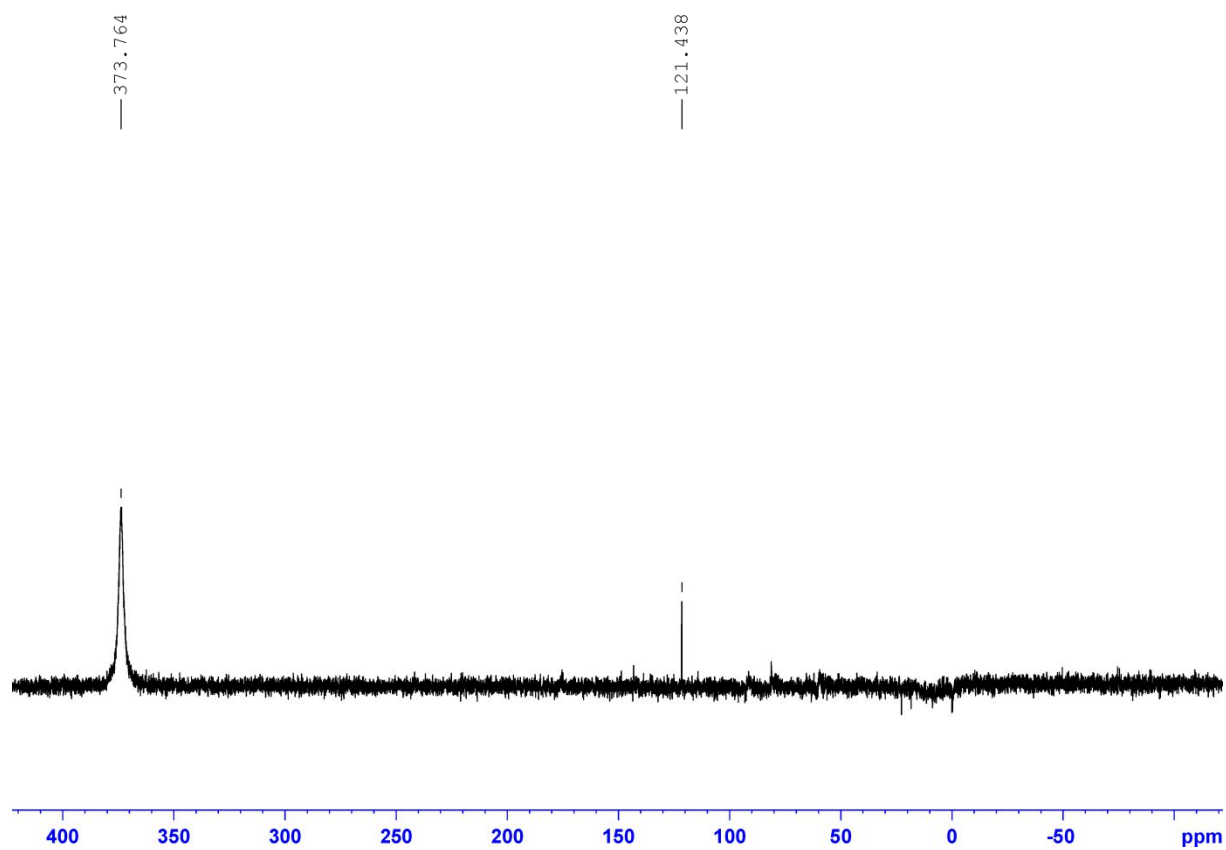

Figure S25:  $^{31}\text{P}\{^1\text{H}\}$  NMR spectrum showing the crude reaction mixture of **5** with 2eqs. of sodium naphthalenide acquired in thf-D8. Signals of the naphthalene as a byproduct are marked with \*.

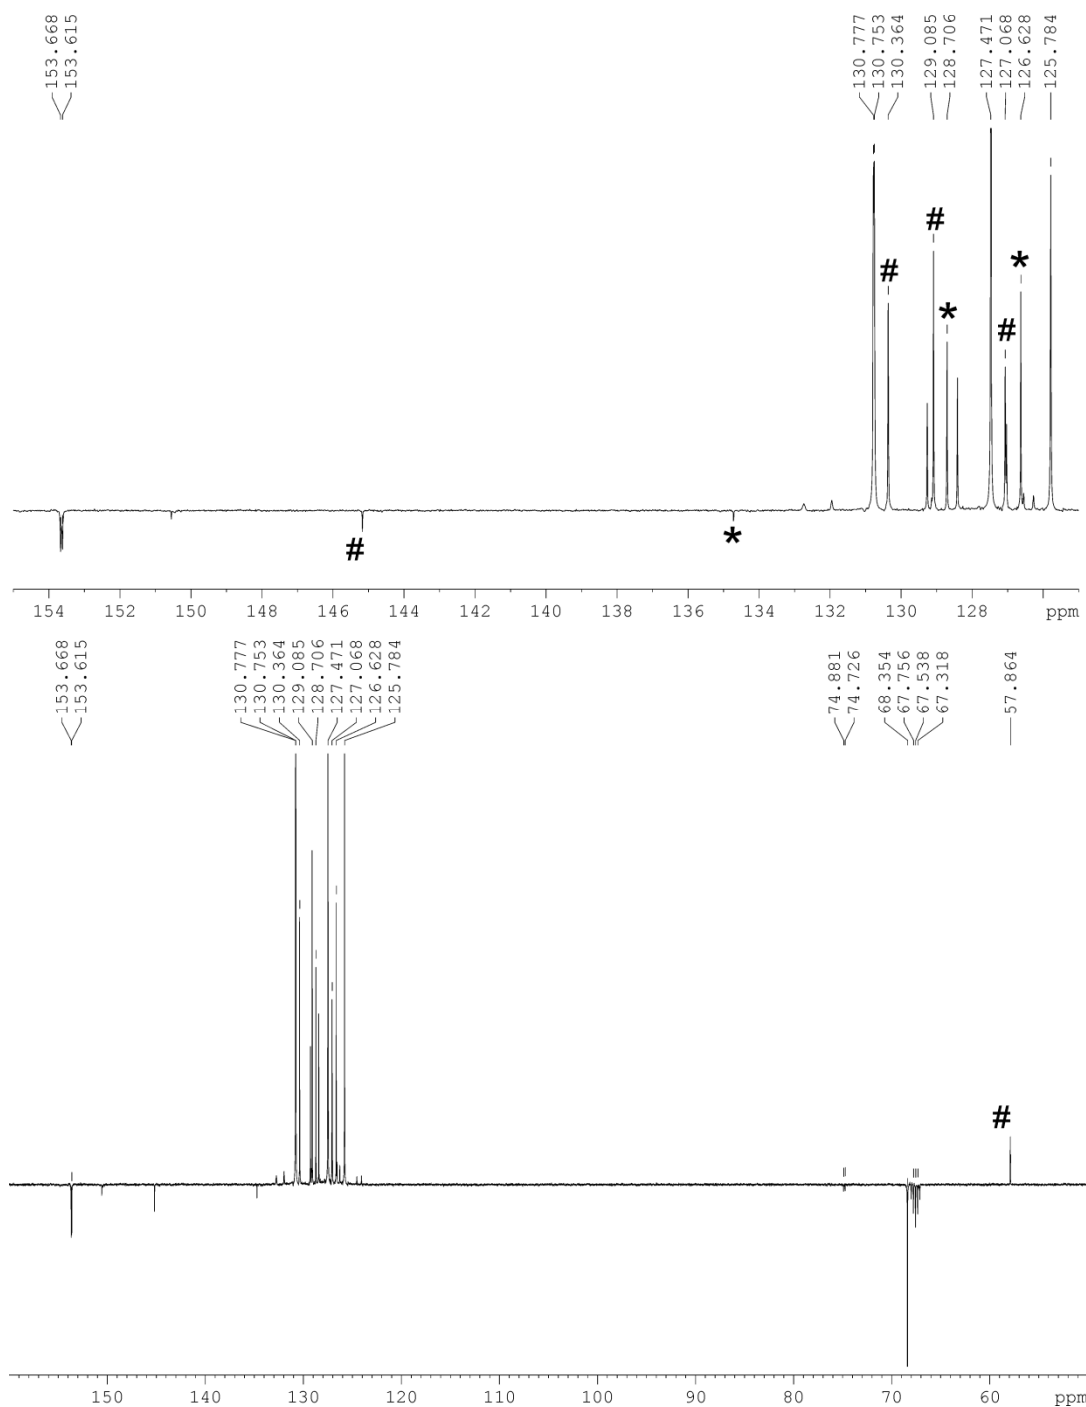

Figure S26.  $^{13}\text{C}\{^1\text{H}\}$  NMR spectrum showing the crude reaction mixture of **5** with 2eqs. of sodium naphthalenide acquired in thf-D8. Signals of the naphthalene as a byproduct are marked with \*. While signals due to the  $\text{Ph}_3\text{CH}$  formed by the hydrolysis  $[(\text{Ph}_3\text{C})\text{Na}(\text{thf})_3]$  (**9**) present always in the reaction mixture (see the discussion in the main article) are marked with # (for comparison of NMR spectra of  $\text{Ph}_3\text{CH}$  recorded in thf-D8 see reference S1).

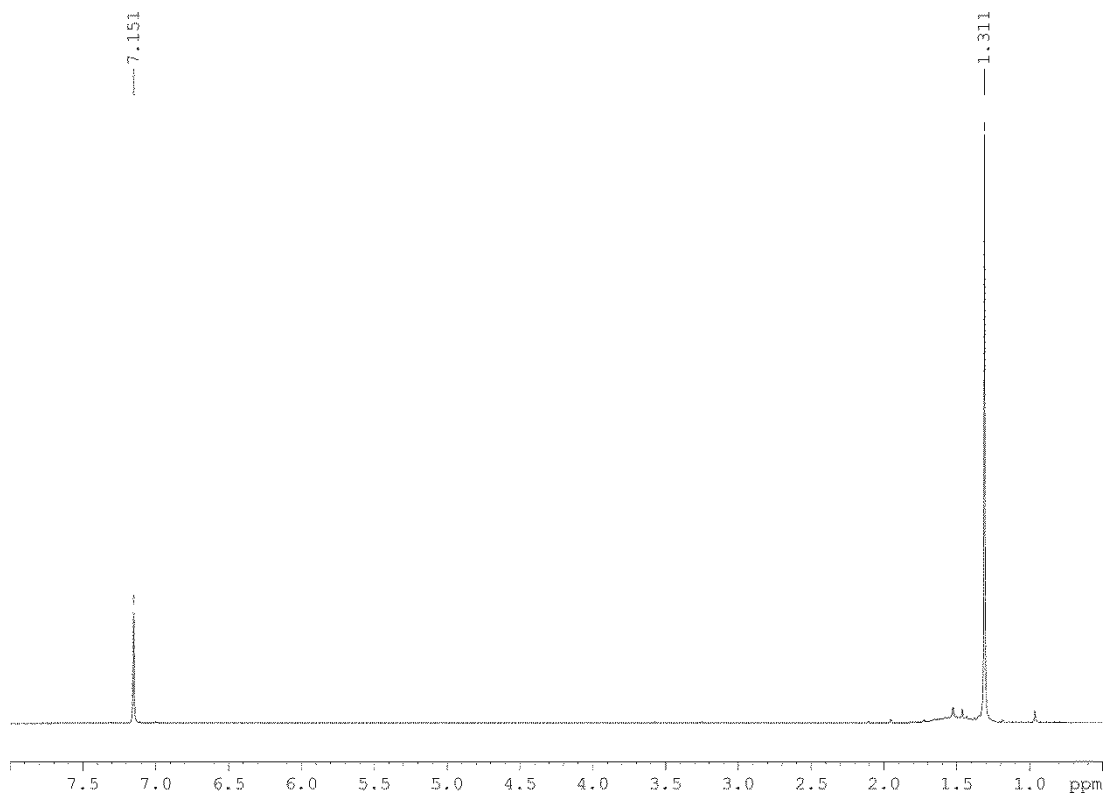

Figure S27:  $^1\text{H}$  NMR spectrum of compound **10** acquired in  $\text{C}_6\text{D}_6$ .

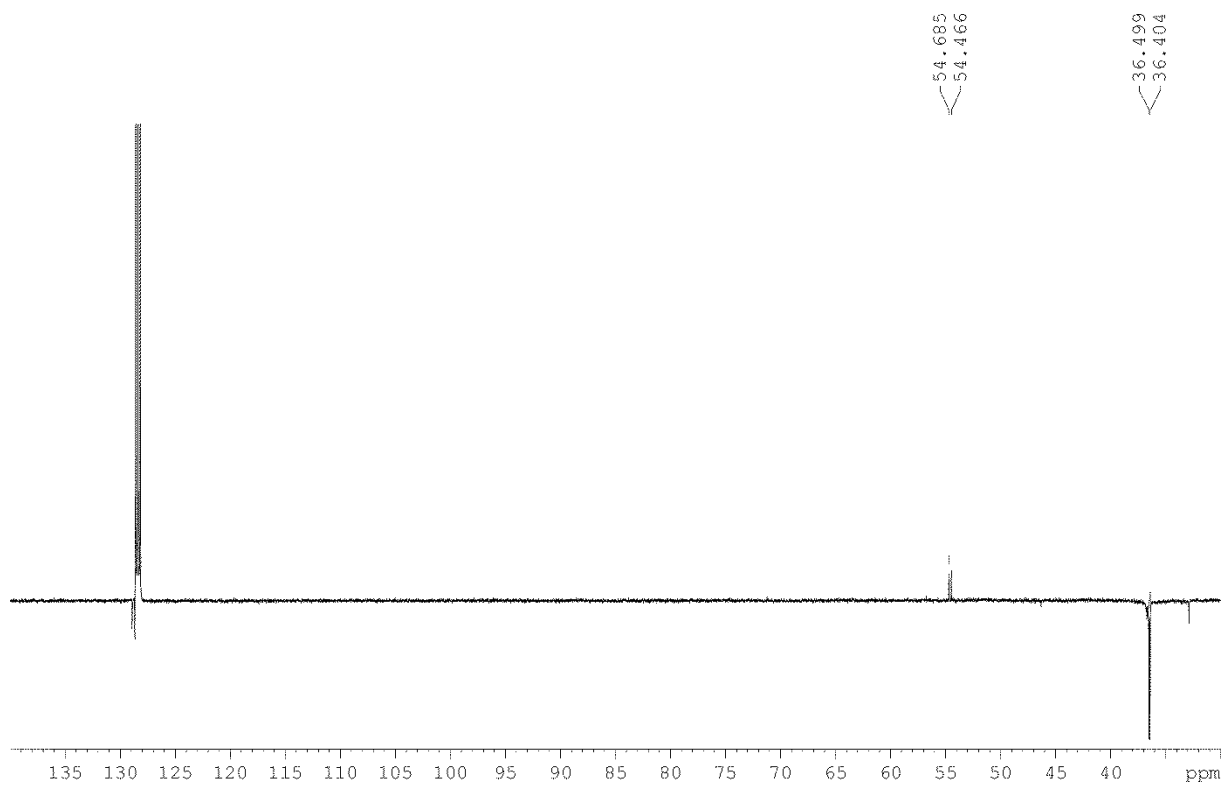



Figure S28:  $^{13}\text{C}\{^1\text{H}\}$  NMR spectrum of compound **10** acquired in  $\text{C}_6\text{D}_6$ .

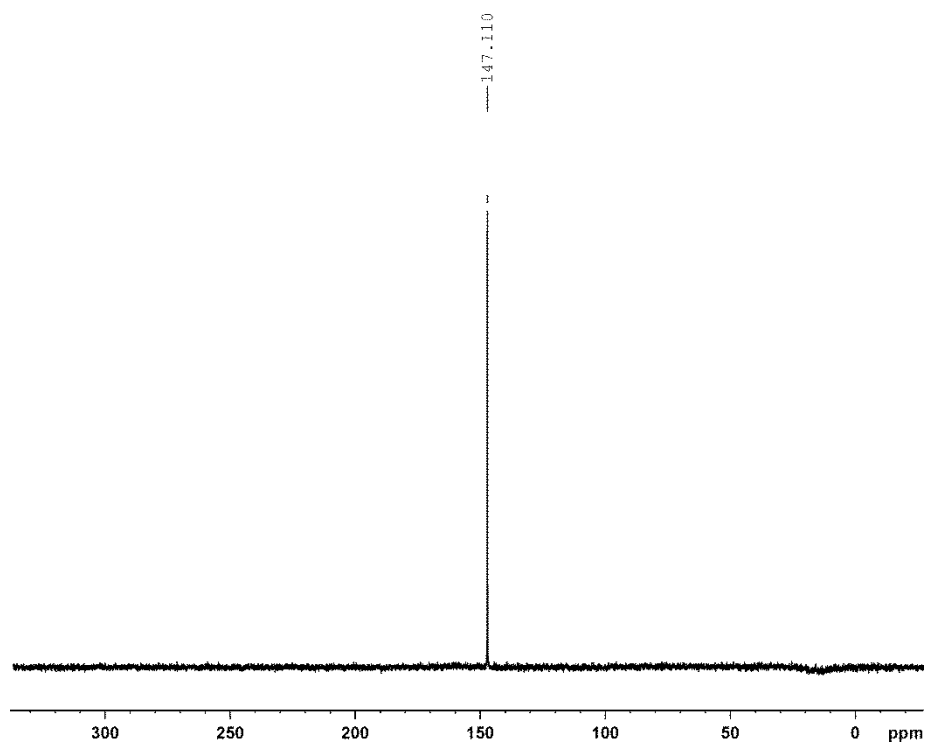

Figure S29:  $^{31}\text{P}\{^1\text{H}\}$  NMR spectrum of compound **10** acquired in  $\text{C}_6\text{D}_6$ .

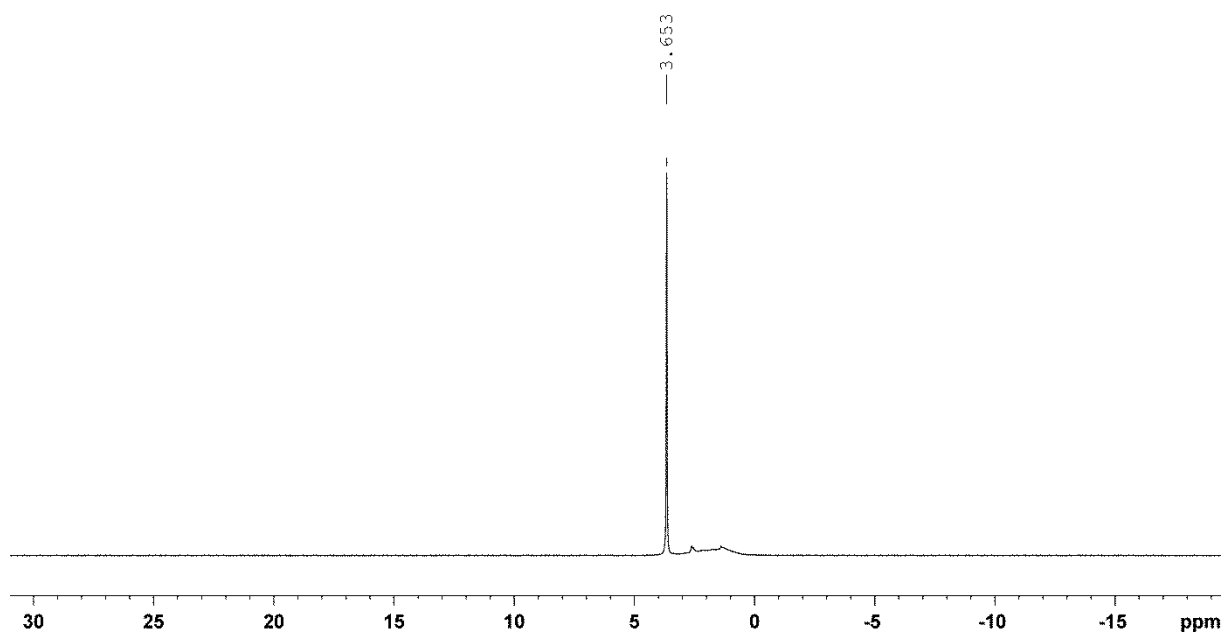

Figure S30:  $^7\text{Li}\{^1\text{H}\}$  NMR spectrum of compound **10** acquired in  $\text{C}_6\text{D}_6$ .

References:

S1 E. Buncel, T.K. Venkatachalam, B. Eliasson and U. Edlund, *J. Am. Chem. Soc.*, 1985, **107**, 303-306.
